# Supplementary material for: Establishment of Food Allergy Model in Dextran Sulfate Sodium Induced Colitis Mice
Source: MDPI journal article supplement (doi:10.3390/foods12051007), 2023-02-27
Supplement: s1 [file s1]

**Table S1.** The histopathology scoring system for colonic sections [30].

| Parameter                  | Description                                                                                          | Score |
|----------------------------|------------------------------------------------------------------------------------------------------|-------|
| Inflammation               | Normal                                                                                               | 0     |
|                            | Minimal infiltration of lamina propria, focal to multifocal                                          | 1     |
|                            | Mild infiltration of lamina propria, multifocal, mild gland separation                               | 2     |
|                            | Moderate to mixed infiltration, multifocal with minimal edema                                        | 3     |
|                            | Marked mixed infiltration into submucosa and lamina propria with extensive areas of gland separation | 4     |
| Epithelium                 | Normal                                                                                               | 0     |
|                            | Minimal: focal mucosal hyperplasia                                                                   | 1     |
|                            | Mild: multifocal tufting of rafts of epithelial cells with increased numbers of goblet cells         | 2     |
|                            | Moderate: extensive locally extensive to multifocal erosion or epithelial attenuation                | 3     |
|                            | Marked: locally extensive mucosal ulceration                                                         | 4     |
| Glands                     | Normal                                                                                               | 0     |
|                            | Minimal: rare gland dilatation                                                                       | 1     |
|                            | Mild: multifocal gland dilatation                                                                    | 2     |
|                            | Moderate: multifocal gland dilatation with abscessation and occasional loss of glands                | 3     |
|                            | Marked: locally extensive to subtotal loss of glands                                                 | 4     |
| Depth of lesion            | None                                                                                                 | 0     |
|                            | Mucosa                                                                                               | 1     |
|                            | Mucosa and submucosa                                                                                 | 2     |
|                            | Transmural                                                                                           | 3     |
| Extent of section affected | None                                                                                                 | 0     |
|                            | Minimal: <10%                                                                                        | 1     |
|                            | Mild: 10–25%                                                                                         | 2     |
|                            | Moderate: 26–50%                                                                                     | 3     |
|                            | Marked: >50%                                                                                         | 4     |

**Table S2.** The histopathology scoring system for small intestinal sections [31].

|  | Description                                                                                                                  | Score |
|--|------------------------------------------------------------------------------------------------------------------------------|-------|
|  | no damage                                                                                                                    | 1     |
|  | a low amount of damage, with distinct structural components (epithelial layer and lamina propria)                            | 2     |
|  | structural components can still be differentiated, but the epithelial layer is noticeably separating from the lamina propria | 3     |
|  | some disorganization of the villi and structural components are difficult to differentiate;                                  | 4     |
|  | the structure of villi is chaotic and many villi are completely destroyed down to the basal layers of tissue                 | 5     |
